# Supplementary material
Source: PubMed Central journal article supplement (PMC3379022)
Supplement: mmc1.pdf [file mmc1.pdf]

Kass *et al.*

## Conformational Properties of the Disease-Causing Z Variant of $\alpha$ 1-Antitrypsin Revealed by Theory and Experiment

Itamar Kass, Anja S. Knaupp, Stephen P. Bottomley, and Ashley M. Buckle

Department of Biochemistry and Molecular Biology, Monash University, Clayton, Victoria, Australia

**Supporting Material****Table S1:** A comparison of H-bond occupancy between wild-type and E342K mutated  $\alpha$ 1-AT.

| H-bond interactions | Found in wild-type crystal structure? | Fractional occupancy during the last 200 ns of a wild-type simulation | Fractional occupancy during the last 200 ns of Z simulation |
|---------------------|---------------------------------------|-----------------------------------------------------------------------|-------------------------------------------------------------|
| E342OE1/2:V200O     | No                                    | 0                                                                     | -                                                           |
| E342OE1/2:T203OG    | Yes                                   | 0                                                                     | -                                                           |
| E342OE1/2:K290NZ    | Yes                                   | 0.52                                                                  | -                                                           |
| K342NZ:V200O        | -                                     | -                                                                     | 0.33                                                        |
| K342NZ:T203OG       | -                                     | -                                                                     | 0.30                                                        |
| K342NZ:K290NZ       | -                                     | -                                                                     | 0                                                           |
| D341O:W194N         | No                                    | 0.60                                                                  | 0                                                           |
| D341O:W194NE1       | Yes                                   | 0                                                                     | 0.65                                                        |

**Table S2:** The average number of H-bonds between s3A and s5A.

| $\alpha$ 1-AT variant  | Following the initial 50 ns of simulations | Last 50 ns of simulations |
|------------------------|--------------------------------------------|---------------------------|
| wt                     | 11 $\pm$ 1                                 | 11 $\pm$ 1                |
| E342K <sub>conf1</sub> | 8 $\pm$ 1                                  | 8 $\pm$ 1                 |
| E342K <sub>conf2</sub> | 8 $\pm$ 1                                  | 8 $\pm$ 1                 |
| E342R                  | 10 $\pm$ 1                                 | 8 $\pm$ 1                 |
| E342Q                  | 10 $\pm$ 1                                 | 9 $\pm$ 1                 |
| K290E/E342K            | 11 $\pm$ 1                                 | 11 $\pm$ 1                |

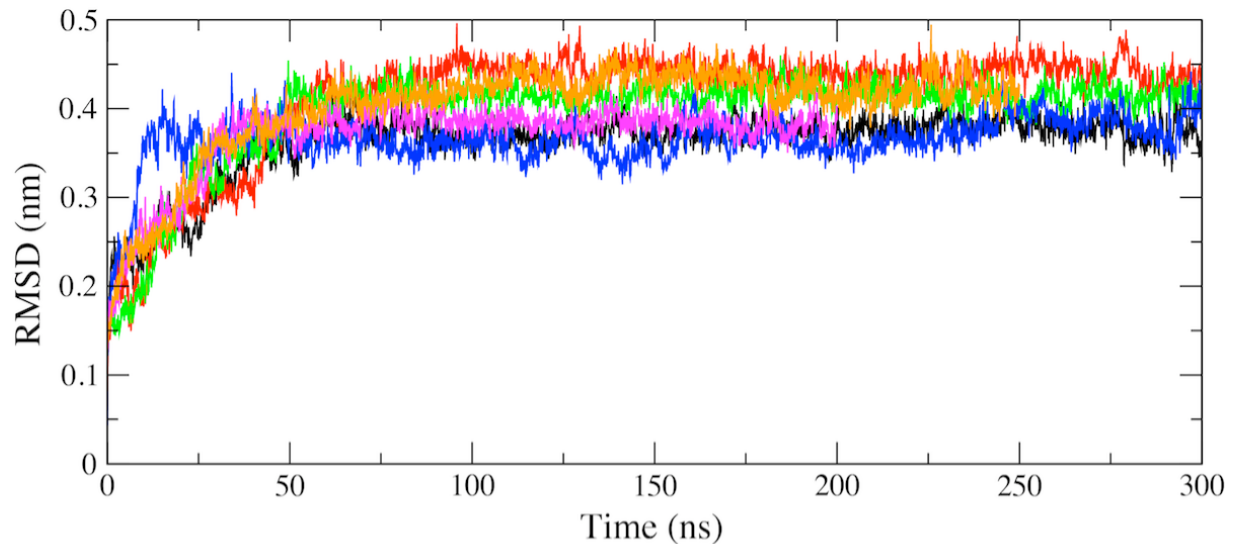

**Fig. S1:** C $\alpha$  RMSD's as function of time for representative trajectories of wild-type (black), E342K<sub>conf1</sub> (red), E342K<sub>conf2</sub> (green), E342R (blue), E342Q (pink) and K290E/E342K (orange) mutated  $\alpha$ 1-AT. Following an initial structural rearrangement stage, during the initial 50 ns of simulations, the average C $\alpha$  RMSDs were found to reach a plateau at  $0.37 \pm 0.02$  nm (wild-type  $\alpha$ 1-AT),  $0.43 \pm 0.04$  nm (E342K<sub>conf1</sub>),  $0.41 \pm 0.04$  nm (E342K<sub>conf2</sub>),  $0.36 \pm 0.02$  nm (E342R),  $0.39 \pm 0.02$  nm (E342Q) and  $0.42 \pm 0.03$  nm (K290E/E342K).

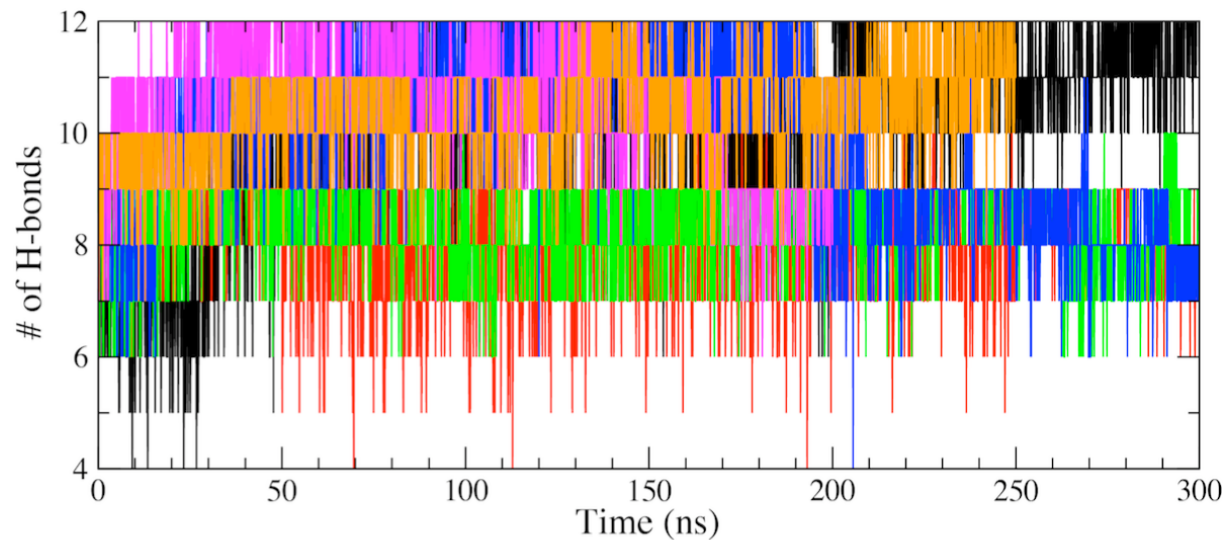

**Fig. S2:** Number of inter-strand H-bonds between strands s3A and s5A as a function of time for representative trajectories of wild-type (black), E342K<sub>conf1</sub> (red), E342K<sub>conf2</sub> (green), E342R (blue), E342Q (pink) and K290E/E342K (orange) mutated  $\alpha$ 1-AT. The average number of H-bonds, following the initial 50 ns of simulations, between s3A and s5A were calculated to be  $11 \pm 1$  (wild-type  $\alpha$ 1-AT),  $8 \pm 1$  (E342K<sub>conf1</sub>),  $8 \pm 1$  (E342K<sub>conf2</sub>),  $10 \pm 1$  (E342R),  $10 \pm 1$  (E342Q) and  $11 \pm 1$  (K290E/E342K).

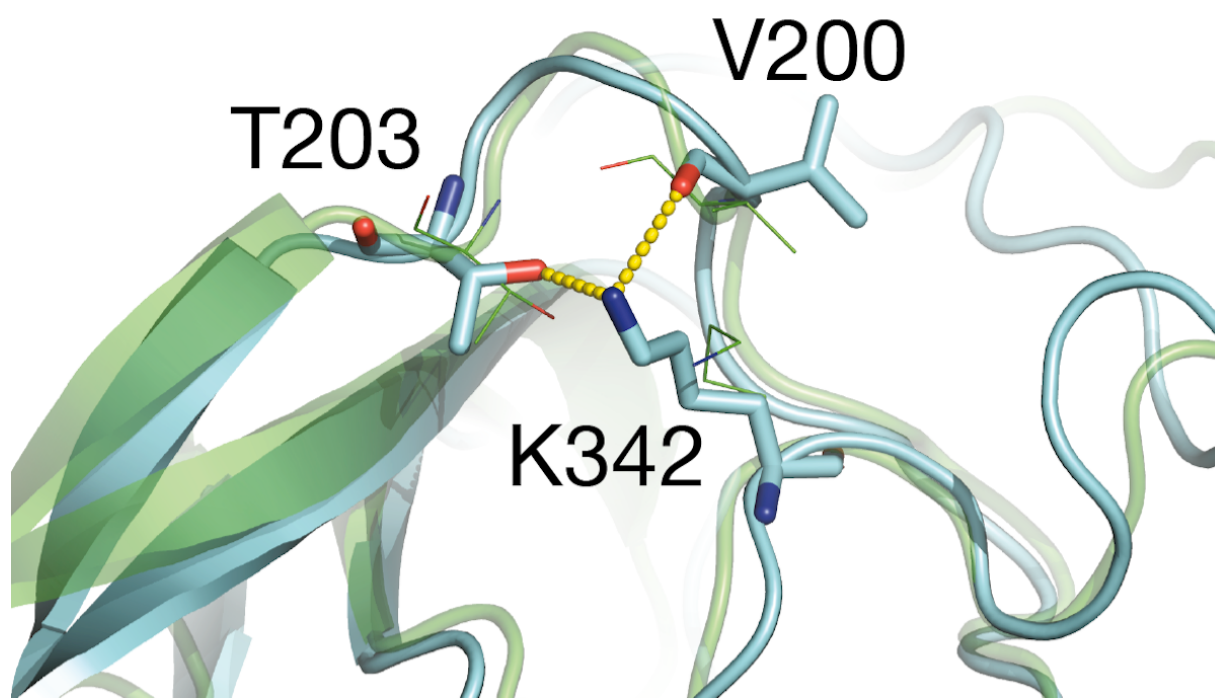

**Fig. S3:** The proximal-hinge region of E342K mutated  $\alpha$ 1-AT (system E342K<sub>conf2</sub>). A comparison between the starting model of E342K<sub>conf2</sub> mutated  $\alpha$ 1-AT (represented as green colored cartoon with residues V200, T203 and K342 drawn as lines) and its conformation after 5 ns of simulation (represented as cyan colored cartoon with residues V200, T203 and K342 drawn as sticks). The H-bonds formed between K342, T203 and V200 during the simulations are represented as yellow broken lines. The conformation of system E342K<sub>conf2</sub> after simulation of 5 ns is very similar to that of the starting structure of E342K<sub>conf1</sub>.

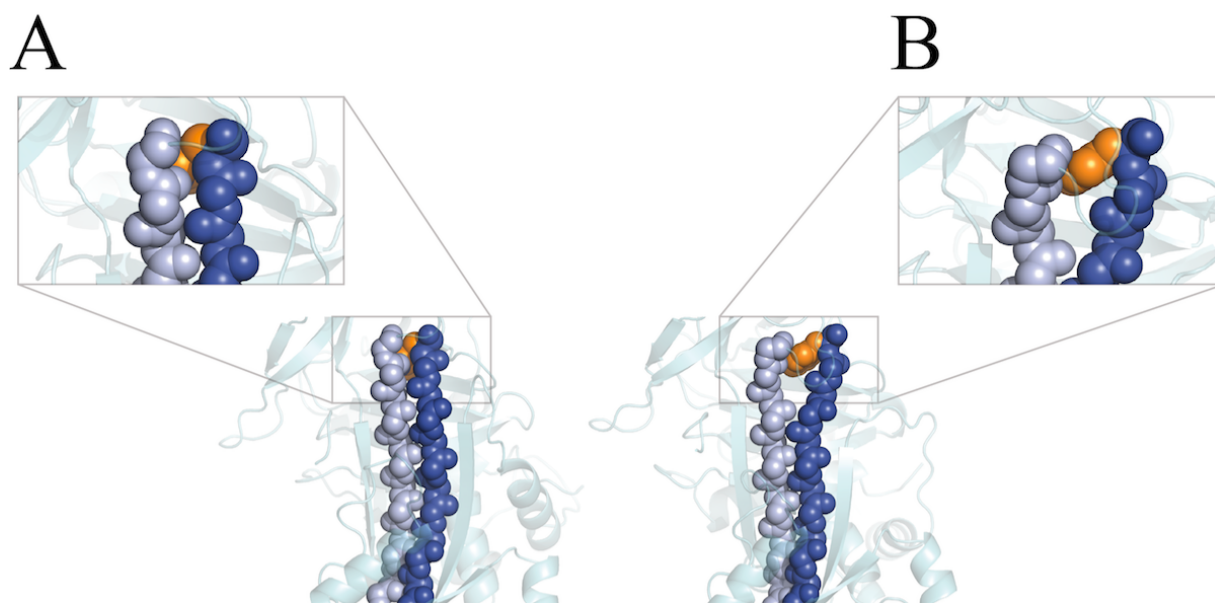

**Fig. S4:** A representation of time averaged structures of **(A)** wild-type and **(B)** E342K mutated  $\alpha$ 1-AT over the last 50 ns of simulation.  $\alpha$ 1-AT is represented as a cartoon, whereas backbone atoms of s3A (light blue), s5A (dark blue) and residue W194 are represented as space-filling models.

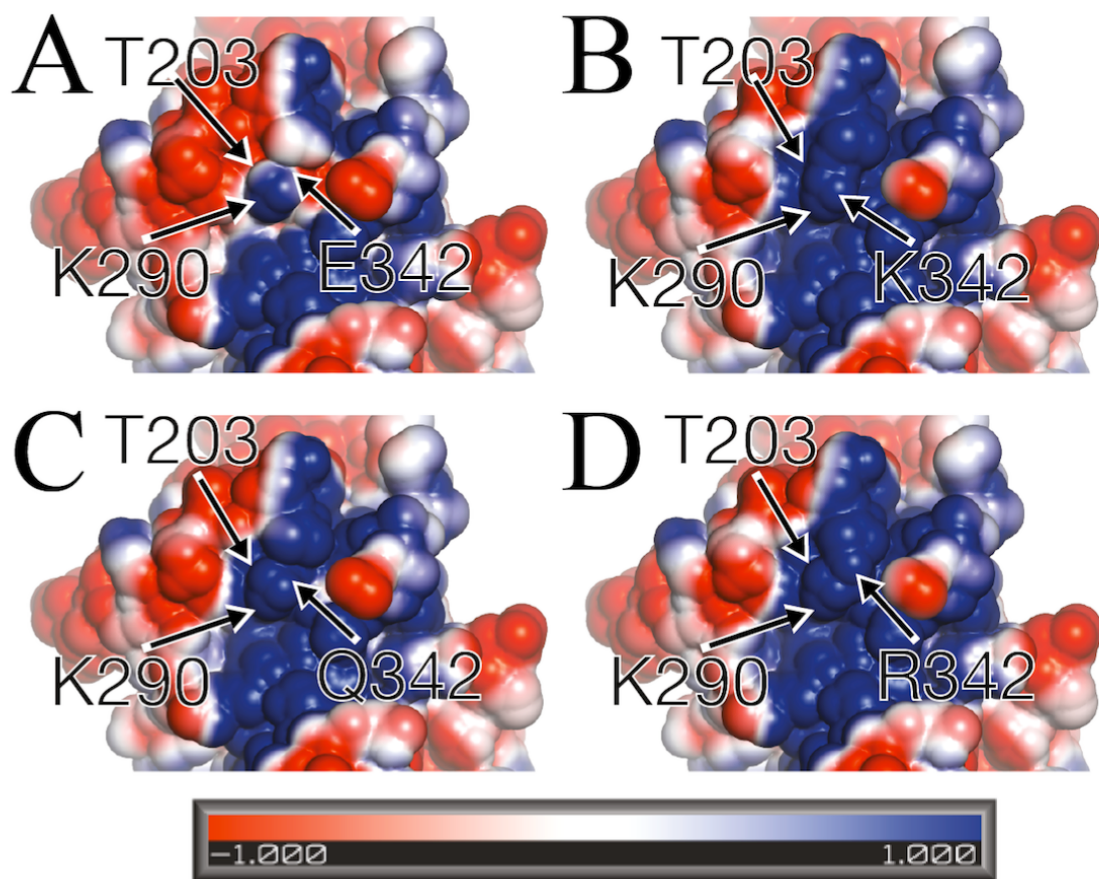

**Fig. S5:** Electrostatic potential of (A) wild-type, (B) E342K, (C) E342Q and (D) E342R  $\alpha 1$ -AT, mapped on solvent accessible surface of  $\alpha 1$ -AT. Color coding is according to the electrostatic potential gradient, where positively and negatively charged areas are represented in blue and red (iso-values from  $+1 \text{ k}_b\text{T}/e_c$  to  $-1 \text{ k}_b\text{T}/e_c$ ), respectively.

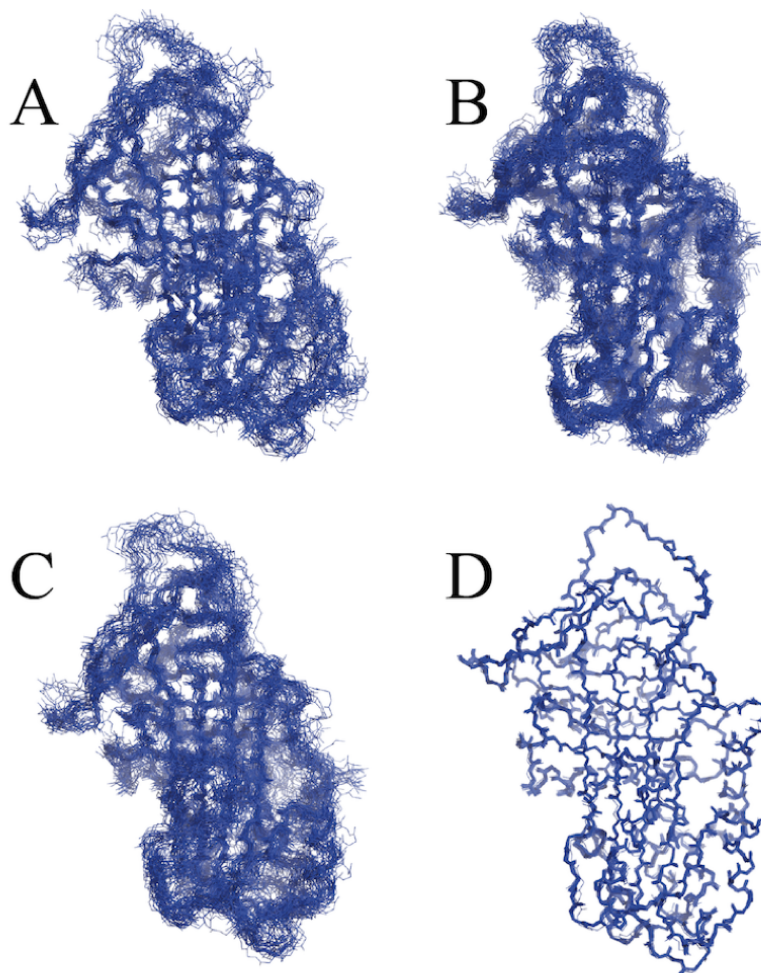

**Fig. S6:** Representative backbone overviews of the dynamics of different simulated systems. Superposition of 20 structures sampled every 10 ns from a 200 ns simulation of **(A)** E342Q, **(B)** 30 structures sampled every 10 ns from a 300 ns simulation of E342R, **(C)** 25 structures sampled every 10 ns from a 250 ns simulation of K290E/E342K mutated  $\alpha$ 1-AT, **(D)** 25 structures sampled every 10 ns from a 250 ns simulation of  $\alpha$ 1-AT in pseudo-crystalline environment.

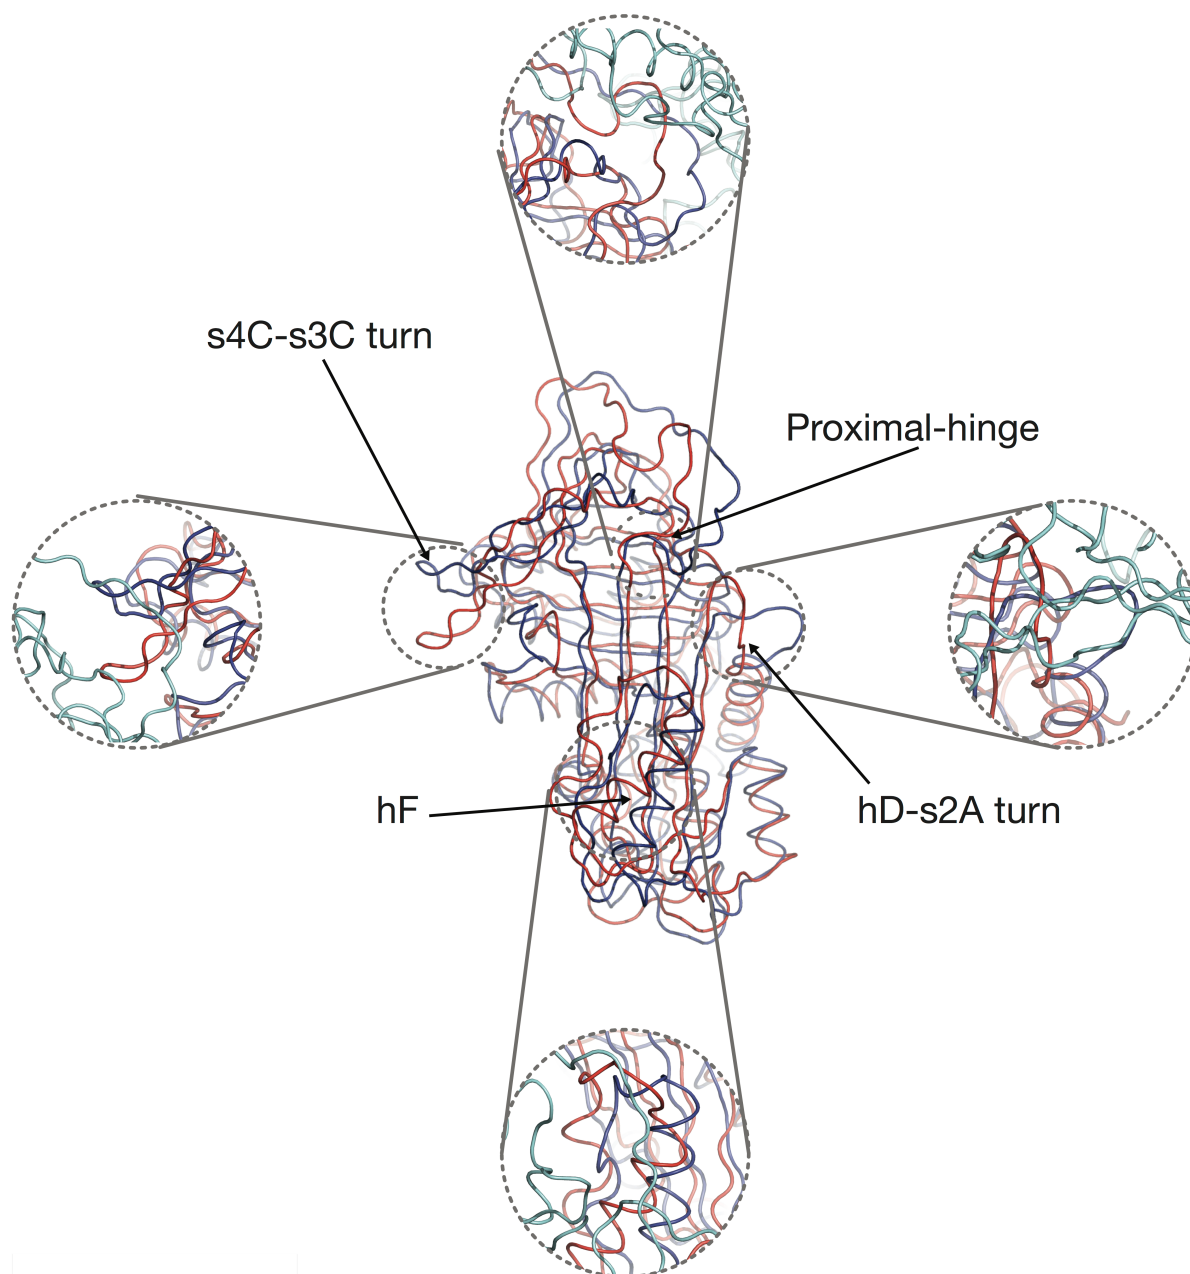

**Fig. S7:** A structural comparison between the crystal structure (1QLP; blue) and a time averaged structure over the last 50 ns of the simulation (red) of  $\alpha 1$ -AT. Regions with large structural differences are highlighted and enlarged in inserts, namely s3C-s4C turn, the proximal-hinge, hD-s2A turn and hF. In each insert, the crystal contacts (within 0.4 nm) are shown in cyan.

**Movie S1:** A movie of a 300 ns representative trajectory of wild-type  $\alpha 1$ -AT in solution. The movie contains snapshots of every 100 ps of the simulation, smoothed for visualization purposes. H-bonds are represented as broken lines.

**Movie S2:** A movie of a 300 ns representative trajectory of Z  $\alpha$ 1-AT in solution. The movie contains snapshots of every 100 ps of the simulation, smoothed for visualization purposes. H-bonds are represented as broken lines.

**Movie S3:** A movie of a 300 ns representative trajectory of E342R  $\alpha$ 1-AT in solution. The movie contains snapshots of every 100 ps of the simulation, smoothed for visualization purposes. H-bonds are represented as broken lines.

**Movie S4:** A movie of a 200 ns representative trajectory of E342Q  $\alpha$ 1-AT in solution. The movie contains snapshots of every 100 ps of the simulation, smoothed for visualization purposes. H-bonds are represented as broken lines.

**Movie S5:** A movie of a 250 ns representative trajectory of the double mutant K290E/E342K  $\alpha$ 1-AT in solution. The movie contains snapshots of every 100 ps of the simulation, smoothed for visualization purposes. H-bonds are represented as broken lines.
